# Supplementary material for: Integrative bioinformatics analysis identifies C1orf198 as a novel prognostic biomarker in colorectal cancer
Source: PeerJ. 2025 Oct 21;13:e20227. doi: 10.7717/peerj.20227 (PMC12551660; doi:10.7717/peerj.20227)
Supplement: Supplemental Information 1 [file peerj-13-20227-s001.xlsx]

## Sheet: Array List
		上海芯超生物科技有限公司						Barcode
		Shanghai Outdo Biotech Company
		Organize chip array design and production registration form						Ctl No.	JS W-11-01
								Version	1.0
/								Record No	1900-01-28
Array Number		HColA160CS01
Chip batch number		XT17-001
Product Description		colon cancer
Organize chip technology personnel (array design)		Xiaojing Shen			Array design date		2017.3.9
Organize chip technology personnel (array production):					Array production date:
Biological sample library administrator (pathology wax block retrieval):		/			Delivery date:		/
Biological sample library administrator (pathology wax block relocation)		/			Return date:		/
Environmental room temperature:		/			Array fusion steps:		51℃ Incubator
Sample type:		■human □rat □mice □rabbit
Fixed method:		■formalin □polyformaldehyde □75% alcohol
Total number of cases:		__80
Total points:		__160
Array arrangement:		__J__rows（A，B，C….Z）×__16__columns（1，2，3，…..100）
Point diameter:		□0.6mm □1.0mm ■1.5mm □2.0mm shift1.8
verification:		□No □Yes Verified by immunohistochemistry____/____
Sample description:		____/____organization，____/____cancer____/____，sample size____/____
Schematic diagram of array arrangement
点位置	Wax block number		Organizational type	Pathological classification		remarks
A01	D15A6598-B30-C01		cancer	Colon adenocarcinoma
A02	D15A6598-B30-P01		Paracancerous	Colonic mucosa
A03	D15A6604-B30-C01		cancer	Colon adenocarcinoma
A04	D15A6604-B30-P01		Paracancerous	Colonic mucosa
A05	D15A6545-B30-C01		cancer	Colon adenocarcinoma
A06	D15A6545-B30-P01		Paracancerous	Colonic mucosa
A07	D15A6560-B30-C01		cancer	Colon adenocarcinoma
A08	D15A6560-B30-P01		Paracancerous	Colonic mucosa
A09	D15A6576-B30-C01		cancer	Colon adenocarcinoma
A10	D15A6576-B30-P01		Paracancerous	Colonic mucosa
A11	D15A6586-B30-C01		cancer	Colon adenocarcinoma
A12	D15A6586-B30-P01		Paracancerous	Colonic mucosa
A13	D15A6618-B30-C01		cancer	Colon adenocarcinoma
A14	D15A6618-B30-P01		Paracancerous	Colonic mucosa
A15	D15A6628-B30-C01		cancer	Colon adenocarcinoma
A16	D15A6628-B30-P01		Paracancerous	Colonic mucosa
B01	D15A6541-B30-C01		cancer	Colon adenocarcinoma
B02	D15A6541-B30-P01		Paracancerous	Colonic mucosa
B03	D15A6546-B30-C01		cancer	Colon adenocarcinoma
B04	D15A6546-B30-P01		Paracancerous	Colonic mucosa
B05	D15A6550-B30-C01		cancer	Colon adenocarcinoma
B06	D15A6550-B30-P01		Paracancerous	Colonic mucosa
B07	D15A6554-B30-C01		cancer	Colon adenocarcinoma
B08	D15A6554-B30-P01		Paracancerous	Colonic mucosa
B09	D15A6558-B30-C01		cancer	Colon adenocarcinoma
B10	D15A6558-B30-P01		Paracancerous	Colonic mucosa
B11	D15A6562-B30-C01		cancer	Colon adenocarcinoma
B12	D15A6562-B30-P01		Paracancerous	Colonic mucosa
B13	D15A6566-B30-C01		cancer	Colon adenocarcinoma
B14	D15A6566-B30-P01		Paracancerous	Colonic mucosa
B15	D15A6582-B30-C01		cancer	Colon adenocarcinoma
B16	D15A6582-B30-P01		Paracancerous	Colonic mucosa
C01	D15A6585-B30-C01		cancer	Colon adenocarcinoma
C02	D15A6585-B30-P01		Paracancerous	Colonic mucosa
C03	D15A6602-B30-C01		cancer	Colon adenocarcinoma
C04	D15A6602-B30-P01		Paracancerous	Colonic mucosa
C05	D15A6609-B30-C01		cancer	Colon adenocarcinoma
C06	D15A6609-B30-P01		Paracancerous	Colonic mucosa
C07	D15A6621-B30-C01		cancer	Colon adenocarcinoma
C08	D15A6621-B30-P01		Paracancerous	Colonic mucosa
C09	D15A6626-B30-C01		cancer	Colon adenocarcinoma
C10	D15A6626-B30-P01		Paracancerous	Colonic mucosa
C11	D15A6627-B30-C01		cancer	Colon adenocarcinoma
C12	D15A6627-B30-P01		Paracancerous	Colonic mucosa
C13	D15A6635-B30-C01		cancer	Colon adenocarcinoma
C14	D15A6635-B30-P01		Paracancerous	Colonic mucosa
C15	D15A6637-B30-C01		cancer	Colon adenocarcinoma
C16	D15A6637-B30-P01		Paracancerous	Colonic mucosa
D01	D15A6638-B30-C01		cancer	Colon adenocarcinoma
D02	D15A6638-B30-P01		Paracancerous	Colonic mucosa
D03	D15A6640-B30-C01		cancer	Colon adenocarcinoma
D04	D15A6640-B30-P01		Paracancerous	Colonic mucosa
D05	D15A6547-B30-C01		cancer	Colon adenocarcinoma
D06	D15A6547-B30-P01		Paracancerous	Colonic mucosa
D07	D15A6549-B30-C01		cancer	Colon adenocarcinoma
D08	D15A6549-B30-P01		Paracancerous	Colonic mucosa
D09	D15A6552-B30-C01		cancer	Colon adenocarcinoma
D10	D15A6552-B30-P01		Paracancerous	Colonic mucosa
D11	D15A6559-B30-C01		cancer	Colon adenocarcinoma
D12	D15A6559-B30-P01		Paracancerous	Colonic mucosa
D13	D15A6563-B30-C01		cancer	Colon adenocarcinoma
D14	D15A6563-B30-P01		Paracancerous	Colonic mucosa
D15	D15A6567-B30-C01		cancer	Colon adenocarcinoma
D16	D15A6567-B30-P01		Paracancerous	Colonic mucosa
E01	D15A6574-B30-C01		cancer	Colon adenocarcinoma
E02	D15A6574-B30-P01		Paracancerous	Colonic mucosa
E03	D15A6577-B30-C01		cancer	Colon adenocarcinoma
E04	D15A6577-B30-P01		Paracancerous	Colonic mucosa
E05	D15A6578-B30-C01		cancer	Colon adenocarcinoma
E06	D15A6578-B30-P01		Paracancerous	Colonic mucosa
E07	D15A6583-B30-C01		cancer	Colon adenocarcinoma
E08	D15A6583-B30-P01		Paracancerous	Colonic mucosa
E09	D15A6591-B30-C01		cancer	Colon adenocarcinoma
E10	D15A6591-B30-P01		Paracancerous	Colonic mucosa
E11	D15A6597-B30-C01		cancer	Colon adenocarcinoma
E12	D15A6597-B30-P01		Paracancerous	Colonic mucosa
E13	D15A6601-B30-C01		cancer	Colon adenocarcinoma
E14	D15A6601-B30-P01		Paracancerous	Colonic mucosa
E15	D15A6615-B30-C01		cancer	Colon adenocarcinoma
E16	D15A6615-B30-P01		Paracancerous	Colonic mucosa
F01	D15A6616-B30-C01		cancer	Colon adenocarcinoma
F02	D15A6616-B30-P01		Paracancerous	Colonic mucosa
F03	D15A6619-B30-C01		cancer	Colon adenocarcinoma
F04	D15A6619-B30-P01		Paracancerous	Colonic mucosa
F05	D15A6623-B30-C01		cancer	Colon adenocarcinoma
F06	D15A6623-B30-P01		Paracancerous	Colonic mucosa
F07	D15A6625-B30-C01		cancer	Colon adenocarcinoma
F08	D15A6625-B30-P01		Paracancerous	Colonic mucosa
F09	D15A6630-B30-C01		cancer	Colon adenocarcinoma
F10	D15A6630-B30-P01		Paracancerous	Colonic mucosa
F11	D15A6639-B30-C01		cancer	Colon adenocarcinoma
F12	D15A6639-B30-P01		Paracancerous	Colonic mucosa
F13	D15A6570-B30-C01		cancer	Colon adenocarcinoma
F14	D15A6570-B30-P01		Paracancerous	Colonic mucosa
F15	D15A6575-B30-C01		cancer	Colon adenocarcinoma
F16	D15A6575-B30-P01		Paracancerous	Colonic mucosa
G01	D15A6605-B30-C01		cancer	Colon adenocarcinoma
G02	D15A6605-B30-P01		Paracancerous	Colonic mucosa
G03	D15A6612-B30-C01		cancer	Colon adenocarcinoma
G04	D15A6612-B30-P01		Paracancerous	Colonic mucosa
G05	D15A6617-B30-C01		cancer	Colon adenocarcinoma
G06	D15A6617-B30-P01		Paracancerous	Colonic mucosa
G07	D15A6632-B30-C01		cancer	Colon adenocarcinoma
G08	D15A6632-B30-P01		Paracancerous	Colonic mucosa
G09	D15A6551-B30-C01		cancer	Colon adenocarcinoma
G10	D15A6551-B30-P01		Paracancerous	Colonic mucosa
G11	D15A6572-B30-C01		cancer	Colon adenocarcinoma
G12	D15A6572-B30-P01		Paracancerous	Colonic mucosa
G13	D15A6592-B30-C01		cancer	Colon adenocarcinoma
G14	D15A6592-B30-P01		Paracancerous	Colonic mucosa
G15	D15A6544-B30-C01		cancer	Colon adenocarcinoma
G16	D15A6544-B30-P01		Paracancerous	Colonic mucosa
H01	D15A6584-B30-C01		cancer	Colon adenocarcinoma
H02	D15A6584-B30-P01		Paracancerous	Colonic mucosa
H03	D15A6588-B30-C01		cancer	Colon adenocarcinoma
H04	D15A6588-B30-P01		Paracancerous	Colonic mucosa
H05	D15A6613-B30-C01		cancer	Colon adenocarcinoma
H06	D15A6613-B30-P01		Paracancerous	Colonic mucosa
H07	D15A6631-B30-C01		cancer	Colon adenocarcinoma
H08	D15A6631-B30-P01		Paracancerous	Colonic mucosa
H09	D15A6571-B30-C01		cancer	Colon adenocarcinoma
H10	D15A6571-B30-P01		Paracancerous	Colonic mucosa
H11	D15A6595-B30-C01		cancer	Colon adenocarcinoma
H12	D15A6595-B30-P01		Paracancerous	Colonic mucosa
H13	D15A6557-B30-C01		cancer	Colon adenocarcinoma
H14	D15A6557-B30-P01		Paracancerous	Colonic mucosa
H15	D15A6580-B30-C01		cancer	Colon adenocarcinoma
H16	D15A6580-B30-P01		Paracancerous	Colonic mucosa
I01	D15A6594-B30-C01		cancer	Colon adenocarcinoma
I02	D15A6594-B30-P01		Paracancerous	Colonic mucosa
I03	D15A6633-B30-C01		cancer	Colon adenocarcinoma
I04	D15A6633-B30-P01		Paracancerous	Colonic mucosa
I05	D15A6539-B30-C01		cancer	Colon adenocarcinoma
I06	D15A6539-B30-P01		Paracancerous	Colonic mucosa
I07	D15A6561-B30-C01		cancer	Colon adenocarcinoma
I08	D15A6561-B30-P01		Paracancerous	Colonic mucosa
I09	D15A6579-B30-C01		cancer	Colon adenocarcinoma
I10	D15A6579-B30-P01		Paracancerous	Colonic mucosa
I11	D15A6573-B30-C01		cancer	Colon adenocarcinoma
I12	D15A6573-B30-P01		Paracancerous	Colonic mucosa
I13	D15A6620-B30-C01		cancer	Colon adenocarcinoma
I14	D15A6620-B30-P01		Paracancerous	Colonic mucosa
I15	D15A6622-B30-C01		cancer	Colon adenocarcinoma
I16	D15A6622-B30-P01		Paracancerous	Colonic mucosa
J01	D15A6606-B30-C01		cancer	Colon adenocarcinoma
J02	D15A6606-B30-P01		Paracancerous	Colonic mucosa
J03	D15A6614-B30-C01		cancer	Colon adenocarcinoma
J04	D15A6614-B30-P01		Paracancerous	Colonic mucosa
J05	D15A6611-B30-C01		cancer	Colon adenocarcinoma
J06	D15A6611-B30-P01		Paracancerous	Colonic mucosa
J07	D15A6634-B30-C01		cancer	Colon adenocarcinoma
J08	D15A6634-B30-P01		Paracancerous	Colonic mucosa
J09	D15A6569-B30-C01		cancer	Colon adenocarcinoma
J10	D15A6569-B30-P01		Paracancerous	Colonic mucosa
J11	D15A6548-B30-C01		cancer	Colon adenocarcinoma
J12	D15A6548-B30-P01		Paracancerous	Colonic mucosa
J13	D15A6556-B30-C01		cancer	Colon adenocarcinoma
J14	D15A6556-B30-P01		Paracancerous	Colonic mucosa
J15	D15A6590-B30-C01		cancer	Colon adenocarcinoma
J16	D15A6590-B30-P01		Paracancerous	Colonic mucosa
K01	Positioning point
