# Supplementary material for: Integrative bioinformatics analysis identifies C1orf198 as a novel prognostic biomarker in colorectal cancer
Source: PeerJ. 2025 Oct 21;13:e20227. doi: 10.7717/peerj.20227 (PMC12551660; doi:10.7717/peerj.20227)
Supplement: Supplemental Information 2 [file peerj-13-20227-s002.xlsx]

## Sheet: 160CS01Detailed pathological da
Organizational type	Organizational code	Tumor surgical organ		gender	age		Patient's chief complaint	tumor history	Family history of cancer	Distant metastasis site	Is it a primary organ	Is it a metastasis	Pathological classification		Pathological grading	tumor size	Tumor site	Tumor description	Tumor texture	Tumor section color	envelope	pathomorphology	Tumor boundary	Degree of infiltration	Are there any organs of recidivism (yes, no, unknown)	Details of Recidivist Organs	Vascular invasion	perineural invasion	Lymph Node Details	Total number of lymph nodes	Positive lymph nodes	T	N	M	Seventh edition clinical staging	Organizational code	Number of lesions	KRAS mutation
cancer/Paracancerous	D15A6598	colon		male	31					None	Yes	No	adenocarcinoma		Ⅱ	3*2*1.4cm	transverse colon							submucosa			（-）	（-）	Peritumoral lymph nodes：(O/14).	14	0	T1	N0	M0	1	D15A6598	Single stove	wild type
cancer/Paracancerous	D15A6604	colon		female	70					None	Yes	No	adenocarcinoma		Ⅱ	4*2.5*1cm	Right hemicolon							submucosa			（-）	（-）	Highest group lymph nodes：(0/3)；Periileal lymph nodes：(0/4)；Peritumoral lymph nodes：(0/5)；Pericolonic lymph nodes：(0/6).	18	0	T1	N0	M0	1	D15A6604	Single stove	Mutation of codon 12
cancer/Paracancerous	D15A6545	colon		male	59					None	Yes	No	adenocarcinoma		Ⅱ	3.5*3.4*1.3cm	sigmoid colon							Deep muscular layer			（-）	（-）	Periintestinal lymph nodes：(0/17)	17	0	T2	N0	M0	1	D15A6545	Single stove	wild type
cancer/Paracancerous	D15A6560	colon		male	71					None	Yes	No	adenocarcinoma		Ⅱ	3.5*2.5*2.5cm	sigmoid colon							Superficial muscle layer			（-）	（-）	Periintestinal lymph nodes〔0/12).	12	0	T2	N0	M0	1	D15A6560	Single stove	wild type
cancer/Paracancerous	D15A6576	colon		male	65					None	Yes	No	adenocarcinoma		Ⅲ	4.3*3.7*3cm；1.5*l.3*0.6cm	colon							Muscle layer			（-）	（-）	Free tissue lymph nodes〔0/9)，Lymph nodes surrounding the tumor〔O/17)；Highest group lymph nodes(0/6).	32	0	T2	N0	M0	1	D15A6576	Double stove	Mutation of codon 12
cancer/Paracancerous	D15A6586	colon		male	71					None	Yes	No	adenocarcinoma		Ⅱ	2.5*2*0.8cm	sigmoid colon							Superficial muscle layer			（-）	（-）	Periintestinal lymph nodes：(0/13).	13	0	T2	N0	M0	1	D15A6586	Single stove
cancer/Paracancerous	D15A6618	colon		female	75					None	Yes	No	adenocarcinoma		Ⅰ-Ⅱ	3*2.7*1cm	colon							Muscle layer，focal to deep muscular layer			（-）	（-）	Peritumoral lymph nodes：(0/4)；Periintestinal lymph nodes：(0/7).	11	0	T2	N0	M0	1	D15A6618	Single stove
cancer/Paracancerous	D15A6628	colon		female	59					None	Yes	No	adenocarcinoma		Ⅱ-Ⅲ	4.5*3.5*0.2cm	Right hemicolon							Deep muscular layer			（-）	（-）	Tumor proximal lymph nodes：(O/11)；Tumor distal lymph nodes：(0/5)；Peritumoral lymph nodes：(0/15）.	31	0	T2	N0	M0	1	D15A6628	Single stove
cancer/Paracancerous	D15A6541	colon		female	42					None	Yes	No	adenocarcinoma		Ⅱ	3*3*2cm	left colon							Serosal layer			（-）	（-）	Periintestinal lymph nodes0/13.	13	0	T3	N0	M0	2A	D15A6541	Single stove	Mutation of codon 12
cancer/Paracancerous	D15A6546	colon		male	70					None	Yes	No	adenocarcinoma		Ⅱ	6*5.3*3cm	ascending colon							Serosal layer			Cancer tissue was observed within the focal vasculature, Intravascular cancer thrombus (-)	（-）	Pericolonic lymph nodes：(0/9)；Lymph nodes surrounding the tumor：(0/l4)；Periileal lymph nodes：(0/3).	26	0	T3	N0	M0	2A	D15A6546	Single stove
cancer/Paracancerous	D15A6550	colon		male	71					None	Yes	No	adenocarcinoma		Ⅱ	4.5*4*0.2cm	sigmoid colon							Serosal layer			Intravascular cancer thrombus (±)	（-）	Peritumoral lymph nodes：(O/11)，Periintestinal lymph nodes：(0/8).	19	0	T3	N0	M0	2A	D15A6550	Single stove
cancer/Paracancerous	D15A6554	colon		female	59					None	Yes	No	adenocarcinoma		Ⅱ	4.5*3.5*1.5cm	Right hemicolon							Serosal			（-）	（-）	Pericolonic lymph nodes：(O/l3)；Periileal lymph nodes：(0/9).	22	0	T3	N0	M0	2A	D15A6554	Single stove	wild type
cancer/Paracancerous	D15A6558	colon		female	56					None	Yes	No	adenocarcinoma		Ⅱ	6*4*0.7cm	Right hemicolon							Serosal layer			（-）	（-）	Periileal lymph nodes：(0/9)；Pericolonic lymph nodes：(0/15)；mesenteric lymph nodes：(0/7)：Lymph nodes surrounding the tumor：(0/7).	38	0	T3	N0	M0	2A	D15A6558	Single stove
cancer/Paracancerous	D15A6562	colon		female	81					None	Yes	No	adenocarcinoma		Ⅱ	7*5*l.2cm	Right hemicolon							Serosal layer			（-）	（-）	Ileal lymph nodes：(0/5)；Peritumoral lymph nodes：(0/1l）.	16	0	T3	N0	M0	2A	D15A6562	Single stove	wild type
cancer/Paracancerous	D15A6566	colon		male	71					None	Yes	No	adenocarcinoma		Ⅲ	5*3.5*0.3cm	Right hemicolon							Serosal layer			（-）	（-）	Tumor proximal and surrounding lymph nodes：(0/15）；Tumor distal lymph nodes：(0/5)；Periileal lymph nodes〔0/3).	23	0	T3	N0	M0	2A	D15A6566	Single stove
cancer/Paracancerous	D15A6582	colon		male	71					None	Yes	No	adenocarcinoma，Partially mucinous adenocarcinoma		Ⅱ	7.5*5.5*0.6cm	Right hemicolon							Serosal layer			（-）	（-）	Periileal lymph nodes：(0/12)；Pericolonic lymph nodes：(0/8)；Peritumoral lymph nodes：(0/24).	44	0	T3	N0	M0	2A	D15A6582	Single stove	wild type
cancer/Paracancerous	D15A6585	colon		male	68					None	Yes	No	adenocarcinoma		Ⅱ	3*2*0.6cm	sigmoid colon							Serosal layer			（-）	（-）		16	0	T3	N0	M0	2A	D15A6585	Single stove	Mutation of codon 13
cancer/Paracancerous	D15A6602	colon		female	80					None	Yes	No	adenocarcinoma		Ⅲ	4.8*4*2cm	Right hemicolon ileocecal valve							Serosal			（-）	（-）	Periileal lymph nodes：(0/3)；Peritumoral lymph nodes：(0/6)；Pericolonic lymph nodes：(0/6).	15	0	T3	N0	M0	2A	D15A6602	Single stove
cancer/Paracancerous	D15A6609	colon		male	56					None	Yes	No	adenocarcinoma		Ⅱ	9.5*6*5cm；4.5*3*2.5cm	colon							Serosal layer			（-）	（-）	Peritumoral lymph nodes of tumor 1: 18; peritumoral lymph nodes of tumor 2: 2; pericolonic lymph nodes: 5, all showing reactive hyperplasia.	25	0	T3	N0	M0	2A	D15A6609	Double stove
cancer/Paracancerous	D15A6621	colon		female	79					None	Yes	No	mucinous adenocarcinoma		Ⅲ	8*6*3cm	transverse colon							Serosal layer			（-）	（-）	Peritumoral lymph nodes：(O/16）.	16	0	T3	N0	M0	2A	D15A6621	Single stove
cancer/Paracancerous	D15A6626	colon		male	53					None	Yes	No	adenocarcinoma，Partially mucinous adenocarcinoma		Ⅱ	8*6*1cm	Right hemicolon							adventitia			（-）	（-）	Periileal lymph nodes：(O/l)；Lymph nodes around the ileocecal valve：(0/9)；Perigallbladder lymph nodes：(0/l)；Proximal colon lymph nodes：(0/2)；Peritumoral lymph nodes：(0/25)；Distal colon lymph nodes：(0/2).	40	0	T3	N0	M0	2A	D15A6626	Single stove
cancer/Paracancerous	D15A6627	colon		male	66					None	Yes	No	adenocarcinoma，Partially mucinous adenocarcinoma		Ⅱ	5.5*5*1.5cm	Right hemicolon							Serosal layer			（-）	（-）	Periileal lymph nodes：(0/3)；Pericolonic lymph nodes：(0/1)；Peritumoral lymph nodes：(0/13）.	17	0	T3	N0	M0	2A	D15A6627	Single stove
cancer/Paracancerous	D15A6635	colon		female	69					None	Yes	No	adenocarcinoma		Ⅱ	4*2.5*1cm	Right hemicolon							Serosal layer			（-）	（-）	Ileal lymph nodes：(0/9)；Colonic lymph nodes：(0/22）.	31	0	T3	N0	M0	2A	D15A6635	Single stove
cancer/Paracancerous	D15A6637	colon		male	58					None	Yes	No	adenocarcinoma		Ⅱ	6*2.5*0.6cm	sigmoid colon							Serosal layer			（-）	（-）	Peritumoral lymph nodes：(0/13)；Periintestinal lymph nodes：(0/10)；Highest group lymph nodes：(0/5)；All show reactive hyperplasia.	28	0	T3	N0	M0	2A	D15A6637	Single stove
cancer/Paracancerous	D15A6638	colon		male	48					None	Yes	No	adenocarcinoma，Partially mucinous adenocarcinoma		Ⅱ	8*6*1cm	Right hemicolon							Deep muscle layer, focal to serosal layer			（-）	（-）	Periileal lymph nodes：(0/9)；ileocecal valve 及Lymph nodes surrounding the tumor：(0/28)；Distal colon lymph nodes：(0/7).	44	0	T3	N0	M0	2A	D15A6638	Single stove
cancer/Paracancerous	D15A6640	colon		male	77					None	Yes	No	adenocarcinoma		Ⅱ	8*6*3.6cm	Right hemicolon							Serosal layer			（-）	（-）	Periileal lymph nodes：(0/1）；Lymph nodes around the ileocecal valve：(0/20)；Peritumoral lymph nodes：(0/7).	28	0	T3	N0	M0	2A	D15A6640	Single stove
cancer/Paracancerous	D15A6547	colon		female	65					None	Yes	No	adenocarcinoma		Ⅱ	3.5*3*0.5cm	sigmoid colon							Subserosal			（-）	（-）	Peritumoral lymph nodes：(O/l5)；mesenteric lymph nodes：(0/2).	17	0	T4a	N0	M0	2B	D15A6547	Single stove	Mutation of codon 12
cancer/Paracancerous	D15A6549	colon		male	45					None	Yes	No	adenocarcinoma，Partially mucinous adenocarcinoma		Ⅱ	6*5*1cm	Right hemicolon							Serosal layer，Perforation in the companion zone			（-）	（-）	Periileal lymph nodes：(0/1)；Ileocecal lymph nodes：(O/15)；Large free tissue lymph nodes：(O/11).	27	0	T4a	N0	M0	2B	D15A6549	Single stove
cancer/Paracancerous	D15A6552	colon		female	60					None	Yes	No	adenocarcinoma		Ⅱ	5*3*0.6cm	descending colon							Subserosal			（-）	（-）	Periintestinal lymph nodes：(0/16)；Mesenteric root lymph nodes：(O/1).	17	0	T4a	N0	M0	2B	D15A6552	Single stove
cancer/Paracancerous	D15A6559	colon		male	88					None	Yes	No	adenocarcinoma		Ⅱ	6*4*0.8cm	descending colon							Subserosal			（-）	（+）	Peritumoral lymph nodes：(O/11）.	11	0	T4a	N0	M0	2B	D15A6559	Single stove	Mutation of codon 13
cancer/Paracancerous	D15A6563	colon		female	83					None	Yes	No	adenocarcinoma		Ⅱ-Ⅲ	3.5*3*0.8cm	transverse colon							Subserosal			（-）	（-）	Peritumoral lymph nodes〔0/15).Reactive lymph node hyperplasia was observed around the neck of the gallbladder (l nodules).	16	0	T4a	N0	M0	2B	D15A6563	Single stove	wild type
cancer/Paracancerous	D15A6567	colon		female	85					None	Yes	No	adenocarcinoma，Partially mucinous adenocarcinoma		Ⅱ	9.5*6*4cm	transverse colon							Subserosal			（-）	（-）	Periintestinal lymph nodes：(O/17).	17	0	T4a	N0	M0	2B	D15A6567	Single stove	Mutation of codon 12
cancer/Paracancerous	D15A6574	colon		female	86					None	Yes	No	adenocarcinoma		Ⅱ	5*3.5*0.5cm	sigmoid colon							Subserosal			（-）	（-）	Lymph nodes surrounding the tumor：(O/l0)；Highest group lymph nodes：(O/1）.	11	0	T4a	N0	M0	2B	D15A6574	Single stove
cancer/Paracancerous	D15A6577	colon		female	78					None	Yes	No	adenocarcinoma		Ⅱ-Ⅲ	5.5*5*2.5cm	Right hemicolon							Subserosal			（-）	（-）	Periileal lymph nodes：(0/3)；Lymph nodes around the ileocecal valve：(0/25)；Pericolonic lymph nodes：(O/14).	42	0	T4a	N0	M0	2B	D15A6577	Single stove	Mutation of codon 12
cancer/Paracancerous	D15A6578	colon		female	65					None	Yes	No	adenocarcinoma		Ⅱ	5*4*0.5cm	sigmoid colon							adventitia			（-）	（-）	Peritumoral lymph nodes：(0/4)，Highest group lymph nodes：(0/2).	6	0	T4a	N0	M0	2B	D15A6578	Single stove
cancer/Paracancerous	D15A6583	colon		female	61					None	Yes	No	adenocarcinoma		Ⅲ	7*7*3cm	transverse colon							Subserosal			（-）	（-）	Peritumoral lymph nodes：(0/12)，Periintestinal lymph nodes：(0/12).	24	0	T4a	N0	M0	2B	D15A6583	Single stove
cancer/Paracancerous	D15A6591	colon		male	84					None	Yes	No	adenocarcinoma		Ⅱ	6.5*5*1.0cm	left colon							Subserosal			（-）	（-）	Lymph nodes surrounding the tumor：(0/12)；Periintestinal lymph nodes：(0/10).	22	0	T4a	N0	M0	2B	D15A6591	Single stove	wild type
cancer/Paracancerous	D15A6597	colon		male	74					None	Yes	No	adenocarcinoma		Ⅱ	4*3.5*0.7cm	Right hemicolon							Subserosal			（-）	（+）	Periileal lymph nodes：(O/l)；Ileocecal lymph nodes：(0/13)；Lymph nodes surrounding the tumor：(0/5).	19	0	T4a	N0	M0	2B	D15A6597	Single stove	Mutation of codon 13
cancer/Paracancerous	D15A6601	colon		male	76					None	Yes	No	adenocarcinoma，Partially signet ring cell carcinoma		Ⅲ	8*7*2cm	Right hemicolon							Subserosal			（-）	（-）	Lymph nodes surrounding the tumor：(0/22)，Pericolonic lymph nodes：(0/7）.	29	0	T4a	N0	M0	2B	D15A6601	Single stove
cancer/Paracancerous	D15A6615	colon		female	68					None	Yes	No	adenocarcinoma		Ⅱ	5*3*0.2cm	hepatic flexure							Subserosal			（-）	（-）	Tumor proximal lymph nodes：(0/6)，Tumor distal lymph nodes：(0/3)，Peritumoral lymph nodes：(0/11）.	20	0	T4a	N0	M0	2B	D15A6615	Single stove	wild type
cancer/Paracancerous	D15A6616	colon		male	71					None	Yes	No	adenocarcinoma，Partially mucinous adenocarcinoma		Ⅱ	9.5*5*0.8cm	Right hemicolon							Subserosal			（-）	（-）	Periileal lymph nodes：(0/2)，肿瘤及Lymph nodes around the ileocecal valve：(O/13)，Colonic lymph nodes：(0/4).	19	0	T4a	N0	M0	2B	D15A6616	Single stove
cancer/Paracancerous	D15A6619	colon		female	53					None	Yes	No	adenocarcinoma，Partially mucinous adenocarcinoma		Ⅱ	8*4*2.5cm	Right hemicolon							Subserosal			（-）	（-）	Peritumoral lymph nodes：0/10)；Distal and Pericolonic lymph nodes：(0/4)；Lymph nodes around the ileocecal valve：(O/l0)；mesenteric lymph nodes：(0/2).	26	0	T4a	N0	M0	2B	D15A6619	Single stove
cancer/Paracancerous	D15A6623	colon		male	68					None	Yes	No	adenocarcinoma		Ⅱ	6*5*3cm	left colon							Subserosal			（-）	（-）		22	0	T4a	N0	M0	2B	D15A6623	Single stove
cancer/Paracancerous	D15A6625	colon		female	51					None	Yes	No	adenocarcinoma，Partially mucinous adenocarcinoma		Ⅱ	5*4*0.3cm	Right hemicolon							Subserosal			（-）	（-）	Peritumoral lymph nodes：(0/19)，Pericolonic lymph nodes：(0/6)，Lymph nodes around the ileocecal valve（0/2)，Periileal lymph nodes：(0/2).	29	0	T4a	N0	M0	2B	D15A6625	Single stove
cancer/Paracancerous	D15A6630	colon		female	71					None	Yes	No	adenocarcinoma		Ⅱ	10*7*1cm	colon							Subserosal			（-）	（-）	Periintestinal lymph nodes：(0/15）.	15	0	T4a	N0	M0	2B	D15A6630	Single stove	wild type
cancer/Paracancerous	D15A6639	colon		male	80					None	Yes	No	adenocarcinoma		Ⅱ	9*7.5*3cm	colon							Subserosal			（-）	（-）	Peritumoral lymph nodes：(0/17)；Periintestinal lymph nodes：(0/10).	27	0	T4a	N0	M0	2B	D15A6639	Single stove
cancer/Paracancerous	D15A6570	colon		male	77					None	Yes	No	adenocarcinoma		Ⅱ	6*4.7*4cm	Right hemicolon							Subserosal		Root of appendix	（-）	（-）	Peritumoral lymph nodes：(0/22)；Pericolonic lymph nodes：(O/11)；Periileal lymph nodes：(0/3).	36	0	T4b	N0	M0	2C	D15A6570	Single stove
cancer/Paracancerous	D15A6575	colon		female	66					None	Yes	No	adenocarcinoma		Ⅱ	6*3.5*0.5cm	Right hemicolon							Subserosal In fibrous adipose tissue			（-）	（-）	IProximal lymph nodes of the tumor：(0/7)，Distal lymph nodes of the tumor：(0/5)，Lymph nodes surrounding the tumor：(O/12).	24	0	T4b	N0	M0	2C	D15A6575	Single stove	Mutation of codon 13
cancer/Paracancerous	D15A6605	colon		male	37					None	Yes	No	adenocarcinoma		Ⅱ-Ⅲ	8*6*3cm	left colon							Subserosal		Invasion of adherent gastric wall tissue to the submucosal layer of the stomach	（-）	（-）	Periintestinal lymph nodes（O/16)，Lymph nodes surrounding the tumor（0/18).	34	0	T4b	N0	M0	2C	D15A6605	Single stove	Mutation of codon 12
cancer/Paracancerous	D15A6612	colon		male	67					None	Yes	No	adenocarcinoma		Ⅰ-Ⅱ	4.5*4*0.2cm	Right hemicolon							Subserosal		appendix	（-）	（-）	Tumor proximal lymph nodes：(0/2)；Tumor distal lymph nodes：(0/2)；Peritumoral lymph nodes：(O/12).	16	0	T4b	N0	M0	2C	D15A6612	Single stove
cancer/Paracancerous	D15A6617	colon		male	68					None	Yes	No	adenocarcinoma，Partially mucinous adenocarcinoma		Ⅱ	11*8.5*2cm	Right hemicolon							Subserosal In fibrous adipose tissue			（-）	（+）	Peritumoral lymph nodes：(0/20)，Pericolonic lymph nodes：(0/9).	29	0	T4b	N0	M0	2C	D15A6617	Single stove	wild type
cancer/Paracancerous	D15A6632	colon		male	74					None	Yes	No	adenocarcinoma		Ⅱ	4.5*4*0.7cm	descending colon							Subserosal In fibrous adipose tissue			（-）	（-）	Periintestinal lymph nodes：(0/12），All show reactive hyperplasia.	12	0	T4b	N0	M0	2C	D15A6632	Single stove
cancer/Paracancerous	D15A6551	colon		male	41					None	Yes	No	adenocarcinoma，Partially mucinous adenocarcinoma		Ⅱ	7*6*1cm	Right hemicolon							Serosal layer			（-）	（-）	mesenteric lymph nodes：(0/6)；Periileal lymph nodes：(1/5)；Lymph nodes around the ileocecal valve：(0/21)；Pericolonic lymph nodes：(0/2)；Mesenteric root lymph nodes：(0/2).	36	1	T3	N1a	M0	3B	D15A6551	Single stove
cancer/Paracancerous	D15A6572	colon		male	77					None	Yes	No	adenocarcinoma		Ⅱ	4*3.5*0.5cm	Right hemicolon							Serosal layer			（-）	（+）	Peritumoral lymph nodes：(l/12)；Ileal lymph nodes：(0/6）.	18	1	T3	N1a	M0	3B	D15A6572	Single stove
cancer/Paracancerous	D15A6592	colon		male	57					None	Yes	No	adenocarcinoma		Ⅱ	8.6*4.5*1.3cm	Right hemicolon							Serosal layer			（-）	（-）	Peritumoral lymph nodes：(1/l0)；ileocecal valve 淋巴结：(0/7)；Ileal lymph nodes：(0/l).	18	1	T3	N1a	M0	3B	D15A6592	Single stove	Mutation of codon 12
cancer/Paracancerous	D15A6544	colon		female	75					None	Yes	No	adenocarcinoma		Ⅱ	4*3.5*0.8cm	sigmoid colon							Serosal layer			（-）	（-）	Periintestinal lymph nodes：2/15；Highest group lymph nodes not seen.	15	2	T3	N1b	M0	3B	D15A6544	Single stove
cancer/Paracancerous	D15A6584	colon		male	79					None	Yes	No	adenocarcinoma		Ⅱ-Ⅲ	13*8.5*2.5cm	Right hemicolon							Serosal layer			（+）	（-）	Lymph nodes around the ileocecal valve：(0/2)，Peritumoral lymph nodes：(2/16)，Distal lymph nodes of the tumor(0/4）.	22	2	T3	N1b	M0	3B	D15A6584	Single stove	wild type
cancer/Paracancerous	D15A6588	colon		female	87					None	Yes	No	adenocarcinoma，Partially mucinous adenocarcinoma		Ⅱ	5*3*0.8cm	Right hemicolon							Serosal layer			（-）	（-）	Ileal lymph nodes：(0/5)；Colonic lymph nodes：(0/3)；Peritumoral lymph nodes：(3/24）.	32	3	T3	N1b	M0	3B	D15A6588	Single stove
cancer/Paracancerous	D15A6613	colon		female	76					None	Yes	No	adenocarcinoma		Ⅲ	8*8*0.8cm	Right hemicolon							Serosal layer			（-）	（-）	Periileal lymph nodes：(0/l)，Lymph nodes around the ileocecal valve：(1/12)，Pericolonic lymph nodes：(1/12).	25	2	T3	N1b	M0	3B	D15A6613	Single stove	wild type
cancer/Paracancerous	D15A6631	colon		female	80					None	Yes	No	adenocarcinoma		Ⅱ	4*3*1cm	sigmoid colon							Serosal layer；Cancer nodules1			（-）	（-）	Peritumoral lymph nodes：(3/21).	21	3	T3	N1b	M0	3B	D15A6631	Single stove
cancer/Paracancerous	D15A6571	colon		male	75					None	Yes	No	adenocarcinoma		Ⅱ	3.5*3*0.5cm	sigmoid colon							Serosal layer			（-）	（-）	Peritumoral lymph nodes：(5/17).	17	5	T3	N2a	M0	3B	D15A6571	Single stove	Mutation of codon 13
cancer/Paracancerous	D15A6595	colon		male	59					None	Yes	No	adenocarcinoma		Ⅱ	5*4.5*0.6cm	sigmoid colon							Serosal layer			（-）	（+）	Periintestinal lymph nodes（4/30）.	30	4	T3	N2a	M0	3B	D15A6595	Single stove	Mutation of codon 12
cancer/Paracancerous	D15A6557	colon		male	84					None	Yes	No	adenocarcinoma		Ⅱ	5*3*1cm	sigmoid colon							Subserosal			（-）	（-）	Peritumoral lymph nodes：(0/1)；Periintestinal lymph nodes：(1/l1）.	12	1	T4a	N1a	M0	3B	D15A6557	Single stove	Mutation of codon 12
cancer/Paracancerous	D15A6580	colon		male	52					None	Yes	No	adenocarcinoma，Partially mucinous adenocarcinoma		Ⅱ-Ⅲ	6*4*1.5cm	Right hemicolon							Subserosal			（-）	（-）	Lymph nodes surrounding the tumor：(1/l3)，Periileal lymph nodes：(0/6)；Highest group lymph nodes：(0/5).	24	1	T4a	N1a	M0	3B	D15A6580	Single stove	Mutation of codon 13
cancer/Paracancerous	D15A6594	colon		female	60					None	Yes	No	adenocarcinoma，Partially mucinous adenocarcinoma		Ⅱ	6.5*3*0.8	left colon							Subserosal			（-）	（-）	Peritumoral lymph nodes：(1/29)；Periintestinal lymph nodes：(0/5).	34	1	T4a	N1a	M0	3B	D15A6594	Single stove	Mutation of codon 12
cancer/Paracancerous	D15A6633	colon		female	65					None	Yes	No	adenocarcinoma		Ⅱ	3.5*2*0.5cm	sigmoid colon							Subserosal			（+）	（+）	Pericolonic lymph nodes：(1/12).	12	1	T4a	N1a	M0	3B	D15A6633	Single stove
cancer/Paracancerous	D15A6539	colon		male	81					None	Yes	No	adenocarcinoma		Ⅱ	4*3.5*0.5cm	sigmoid colon							Subserosal			（-）	（-）	Periintestinal lymph nodes：（3/9）；Highest group lymph nodes（0/2）.	11	3	T4a	N1b	M0	3B	D15A6539	Single stove
cancer/Paracancerous	D15A6561	colon		female	55					None	Yes	No	adenocarcinoma		Ⅱ	5*4.5*0.5cm	Right hemicolon							Subserosal			（-）	（+）	Periileal lymph nodes：(0/4)；Pericolonic lymph nodes：(3/22).	26	3	T4a	N1b	M0	3B	D15A6561	Single stove
cancer/Paracancerous	D15A6579	colon		male	56					None	Yes	No	adenocarcinoma		Ⅱ	4*3.5*0.5cm	Right hemicolon							Subserosal			（-）	（-）	Periileal lymph nodes（0/3），Lymph nodes around the ileocecal valve（0/7），Pericolonic lymph nodes（2/18）.	28	2	T4a	N1b	M0	3B	D15A6579	Single stove	Mutation of codon 12
cancer/Paracancerous	D15A6573	colon		female	54					None	Yes	No	adenocarcinoma		Ⅱ	4.5*3*0.5cm	hepatic flexure							Subserosal ；Cancer nodules2			（-）	（-）	Periileal lymph nodes：(0/9)；Lymph nodes around the ileocecal valve：(0/13)；Pericolonic lymph nodes：(0/5）.	27	0	T4a	N1c	M0	3B	D15A6573	Single stove
cancer/Paracancerous	D15A6620	colon		male	52					None	Yes	No	adenocarcinoma		Ⅱ-Ⅲ	4*3*1cm	Right hemicolon							Subserosal			（-）	（-）	Periileal lymph nodes：(0/4)，Lymph nodes around the ileocecal valve（0/9)，Pericolonic lymph nodes4/15).	28	4	T4a	N2a	M0	3C	D15A6620	Single stove	Mutation of codon 13
cancer/Paracancerous	D15A6622	colon		female	75					None	Yes	No	adenocarcinoma		Ⅲ	5.5*4.5*4cm	Right hemicolon ileocecal valve							Subserosal		Multiple cancer nodules in the mesentery	（-）	（+）	Lymph nodes surrounding the tumor：(5/7)，Periileal lymph nodes（1/3)，Pericolonic lymph nodes（0/9).	19	6	T4a	N2a	M0	3C	D15A6622	Single stove
cancer/Paracancerous	D15A6606	colon		male	79					None	Yes	No	adenocarcinoma		Ⅱ-Ⅲ	4.5*4*0.8cm	sigmoid colon							Subserosal In fibrous adipose tissue			（+）	（+）	Peritumoral lymph nodes：(0/9)，mesenteric lymph nodes：(1/8)，Highest group lymph nodes：(0/3）.	20	1	T4b	N1a	M0	3C	D15A6606	Single stove
cancer/Paracancerous	D15A6614	colon		female	61					None	Yes	No	adenocarcinoma		Ⅱ-Ⅲ	4*3.6*0.5cm	sigmoid colon							Subserosal In fibrous adipose tissue			（-）	（-）	Peritumoral lymph nodes：(0/6)，mesenteric lymph nodes：(0/2)，Highest group lymph nodes：(1/9).	17	1	T4b	N1a	M0	3C	D15A6614	Single stove	Mutation of codon 12
cancer/Paracancerous	D15A6611	colon		female	52					None	Yes	No	adenocarcinoma		Ⅱ	4.7*2.5*1cm	Right hemicolon							Subserosal In fibrous adipose tissue			（-）	（+）	Lymph nodes surrounding the tumor：(2/17)；Periintestinal lymph nodes：(0/17).	34	2	T4b	N1b	M0	3C	D15A6611	Single stove
cancer/Paracancerous	D15A6634	colon		male	65					None	Yes	No	adenocarcinoma		Ⅱ-Ⅲ	6*3*0.8cm	Right hemicolon ileocecal valve							Subserosal In fibrous adipose tissue			（-）	（-）	Lymph nodes surrounding the tumor：(5/16)；Pericolonic lymph nodes：(0/4)；Highest group lymph nodes：(0/2).	22	5	T4b	N2a	M0	3C	D15A6634	Single stove
cancer/Paracancerous	D15A6569	colon		female	68					liver	Yes	No	adenocarcinoma		Ⅱ	5.5*5*0.6cm	sigmoid colon							Serosal layer			（-）	（-）	Highest group lymph nodes（0/8)，Lymph nodes surrounding the tumor（0/l3)，Distal lymph nodes of the tumor(0/5).	26	0	T3	N0	M1	4	D15A6569	Single stove	wild type
cancer/Paracancerous	D15A6548	colon		female	59					liver	Yes	No	adenocarcinoma		Ⅱ	6*3*0.5cm	left colon							Serosal layer, In fibrous adipose tissue			（-）	（-）	Peritumoral lymph nodes：(2/13)；Periintestinal lymph nodes：(0/4).	17	2	T3	N1b	M1	4	D15A6548	Single stove
cancer/Paracancerous	D15A6556	colon		male	58					stomach	Yes	No	adenocarcinoma，Partially mucinous adenocarcinoma		Ⅱ	4.5*4*l.2cm	transverse colon							Subserosal			（-）	（-）	mesenteric lymph nodes：(1/23）transfer.	23	1	T4a	N1a	M1	4	D15A6556	Single stove
cancer/Paracancerous	D15A6590	colon		female	62					liver	Yes	No	mucinous adenocarcinoma		Ⅲ	6*5.5*1.5cm	Right hemicolon							Subserosal			（+）	（+）	Lymph nodes surrounding the tumor：(3/9)；Highest group lymph nodes：(0/5)；Pericolonic lymph nodes：(0/20)；Periileal lymph nodes：(0/4).	38	3	T4a	N1b	M1	4	D15A6590	Single stove
